# Supplementary material for: Fluorescent Nanodiamonds Enable Long-Term Detection of Human Adipose-Derived Stem/Stromal Cells in an In Vivo Chondrogenesis Model Using Decellularized Extracellular Matrices and Fibrin Glue Polymer
Source: PubMed Central journal article supplement (PMC6780225; doi:10.3390/polym11091391), 2019-08-23
Supplement: polymers-11-01391-s001.pdf [file polymers-11-01391-s001.pdf]

1 **Supplement 1**

2 **Figure S1. FNDs result in no alteration on cell differentiation derived from**  
3 **hASCs.**

4  $1 \times 10^5$  hASCs were pre-incubated with 100  $\mu$ g/mL FNDs overnight and replaced  
5 with induction and culture medium of (A) adipogenesis, (B) osteogenesis or (C)  
6 chondrogenesis for 3 weeks. Differentiations were confirmed by Oil-Red O, Alizarin  
7 Red S and Alcian Blue staining respectively. (Magnification  $\times 200$ )

8  
9  
10 **Figure S1.**

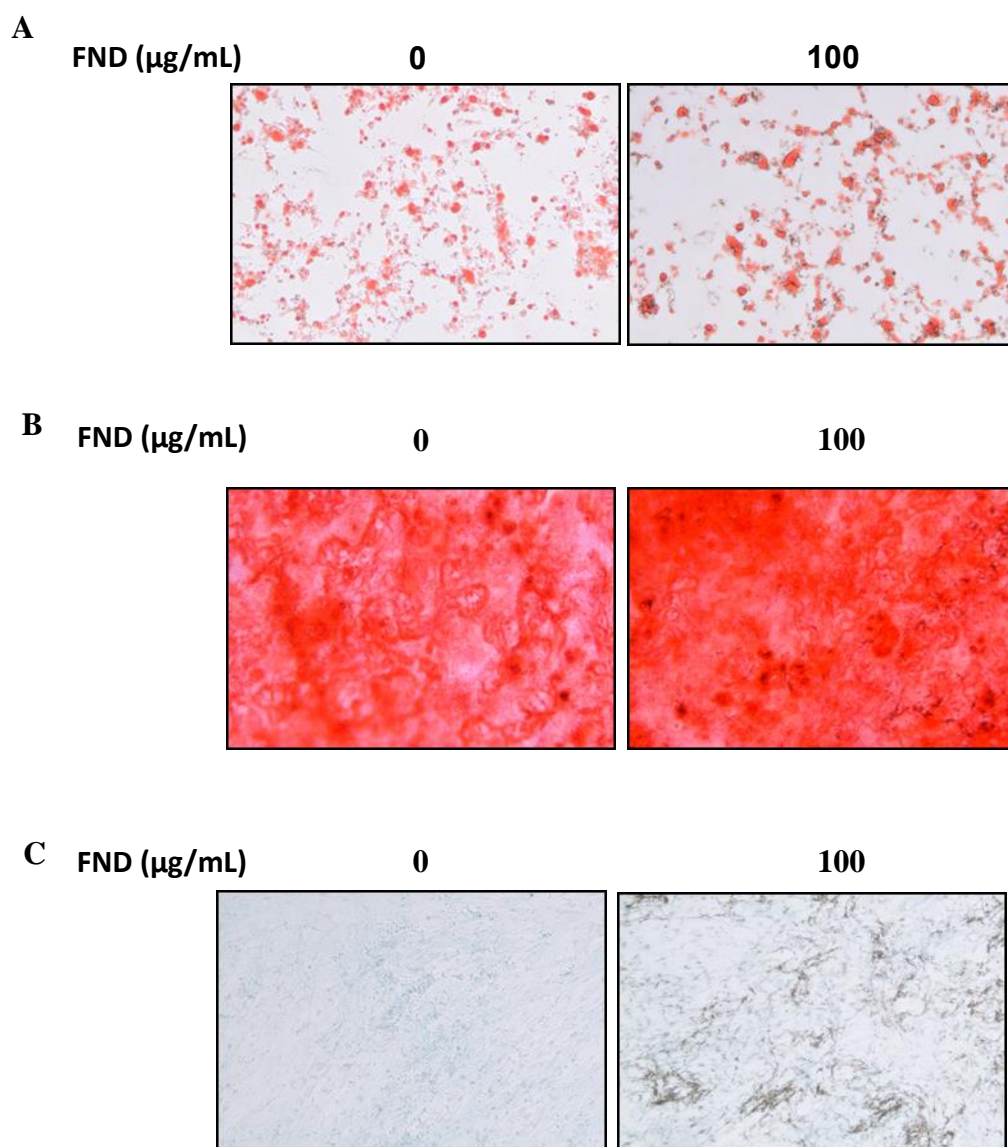

38 Supplement 2

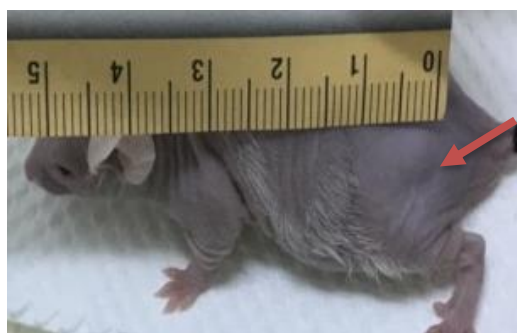

47

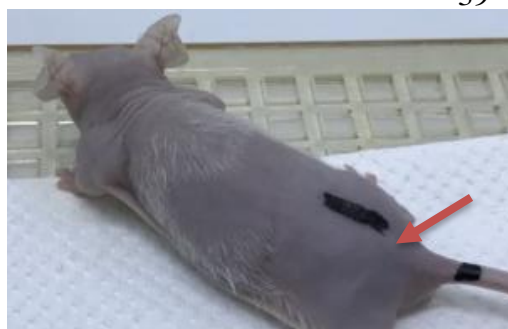

39

48 **Figure S2.**

49 **Appearance of hASC – glue group nude mice before (left) or after one-month**  
 50 **(right) implantation.** The arrows indicate the locations of the implanted xenograft.

51

52

53

54 Supplement 3

55 **Figure S3. (a) The allogenic irradiated costal cartilages were grounded into**  
 56 **particles approximately 0.5 mm x 0.5 mm x 0.5 mm in size as decellularized**  
 57 **cartilage ECM. (b) The ECM particles were then loaded into the syringe.**

58 (a).

(b)

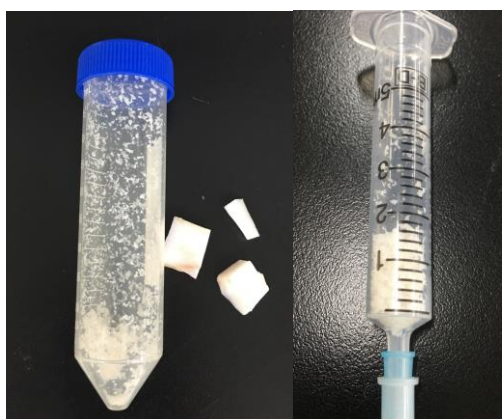

59

60

61

62

63

64

65

66

67

68

69

70

71

72 **Supplement 4**

73 **Figure S4. SDS-PAGE analysis of HSA in hASCs incubated with HSA and**  
74 **FND@HSA.** The hASCs were incubated, respectively with HSA, and 200 µg/mL  
75 FND conjugated HSA for 4 and 6 hours. The protein lysates of these hASCs after  
76 incubation or without incubation were subjected to SDS- PAGE analysis with  
77 Coomassie staining. The presence of HSA (red arrows) increased in the cell lysates  
78 of hASCs with FND conjugated HSA incubation for 4 and 6 hours compared with  
79 hASCs with HSA incubation. HSA served as a positive control.

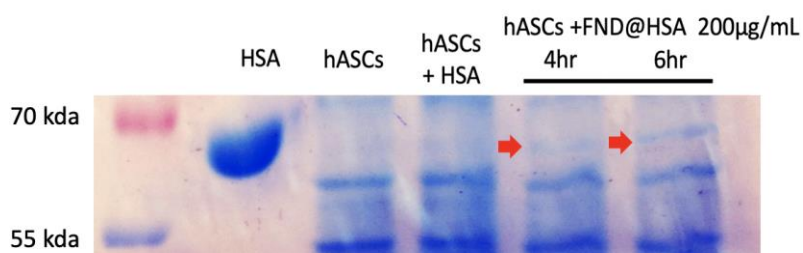

80

81
